# Supplementary material for: Intake of Different Dietary Proteins and Risk of Heart Failure in Men: The Kuopio Ischaemic Heart Disease Risk Factor Study
Source: PubMed Central journal article supplement (PMC6023591; doi:10.1161/circheartfailure.117.004531), 2018-05-29
Supplement: hhf-11-e004531-s001.pdf [file hhf-11-e004531-s001.pdf]

## SUPPLEMENTAL MATERIAL

Supplemental table 1. Dietary sources of protein among 2441 men from the Kuopio Ischaemic Heart Disease Risk Factor Study

| ANIMAL PROTEIN SOURCES |                        |             |            |                     |                 |                      |                               | PLANT PROTEIN SOURCES |
|------------------------|------------------------|-------------|------------|---------------------|-----------------|----------------------|-------------------------------|-----------------------|
| MEAT                   |                        |             |            | DAIRY               |                 | OTHER ANIMAL SOURCES |                               |                       |
| Unprocessed red meat   | Processed red meat     | White meat* | Offal      | Non-fermented dairy | Fermented dairy | Fish                 | Eggs                          |                       |
| Beef and veal          | Sausage                | Chicken     | Liver      | Milk                | Cheese          | Fish                 | Whole eggs                    | Grain products        |
| Pork                   | Bacon                  | Turkey      | Kidney     | Cream               | Cottage cheese  | Shellfish            | Eggs in foods and baked goods | Legumes               |
| Mutton and lamb        | Store-marinated meats  |             | Heart      | Ice cream           | Sour milk       |                      |                               | Nuts and seeds        |
| Game (elk, reindeer)   | Cold cuts              |             | Sweetbread | Milk pudding        | Yoghurt         |                      |                               | Potatoes              |
|                        | Canned processed meats |             | Blood      | Powdered milk       | Curdled milk    |                      |                               | Vegetables            |
|                        | Meat aspic             |             |            |                     | Quark           |                      |                               | Mushrooms             |
|                        |                        |             |            |                     | Sour cream      |                      |                               | Fruits and berries    |
|                        |                        |             |            |                     | Crème fraiche   |                      |                               |                       |
|                        |                        |             |            |                     | Fromage frais   |                      |                               |                       |

\* All white meat was unprocessed.



\*Correlation assessed by Spearman correlation coefficient.

†Of the mean daily protein intake, 2.2 g was from sources that could not easily be classified as animal or plant protein (for example, dry ready meals and chocolate) and was included into neither animal nor plant protein

‡Total meat includes red meat, white meat, and offal.

§Non-significant. For all other correlations  $P < 0.05$ .

**Supplemental table 3. Baseline characteristics according to fermented dairy protein intake among 2441 men from the Kuopio Ischaemic Heart Disease Risk Factor Study\***

| Characteristic                           | Fermented dairy protein  |                          |                           |                           |
|------------------------------------------|--------------------------|--------------------------|---------------------------|---------------------------|
|                                          | Quartile 1               | Quartile 2               | Quartile 3                | Quartile 4                |
|                                          | median intake<br>1.4 g/d | median intake<br>6.9 g/d | median intake<br>12.8 g/d | median intake<br>22.7 g/d |
| Subjects, n                              | 610                      | 610                      | 611                       | 610                       |
| <b>Demographic and lifestyle factors</b> |                          |                          |                           |                           |
| Age, y                                   | 53.2±5.0                 | 53.1±4.9                 | 52.7±5.3                  | 52.5±5.4 <sup>†</sup>     |
| Education, y                             | 8.0±3.0                  | 8.8±3.4                  | 9.1±3.9                   | 9.0±3.5 <sup>†</sup>      |
| Income, 1000 €                           | 10,1 (8,2)               | 11,9 (8,7)               | 12,4 (9,0)                | 12,6 (10,1) <sup>†</sup>  |
| Married, %                               | 81.3                     | 87.0                     | 89.0                      | 89.3 <sup>†</sup>         |
| Current smoker, %                        | 41.0                     | 34.3                     | 27.3                      | 25.9 <sup>†</sup>         |
| Regular use of dietary supplements, %    | 5.2                      | 6.9                      | 7.7                       | 10.3 <sup>†</sup>         |
| Alcohol intake, g/wk                     | 30 (106)                 | 28 (81)                  | 32 (81)                   | 32 (83)                   |
| Leisure time physical activity, kcal/d   | 64 (119)                 | 85 (170)                 | 99 (179)                  | 92 (166) <sup>†</sup>     |
| Body mass index, kg/m <sup>2</sup>       | 26.8±3.9                 | 26.7±3.4                 | 26.5±3.3                  | 27.0±3.5                  |

| <b>Health and disease status</b>             |             |             |             |                        |
|----------------------------------------------|-------------|-------------|-------------|------------------------|
| Serum total cholesterol to HDL ratio         | 4.56 (1.79) | 4.53 (1.84) | 4.55 (1.88) | 4.55 (1.83)            |
| Serum triglycerides, mmol/L                  | 1.07 (0.69) | 1.10 (0.73) | 1.12 (0.77) | 1.10 (0.80)            |
| Serum magnesium, mg/L                        | 19.8±1.5    | 19.9±1.5    | 19.9±1.5    | 19.8±1.6               |
| Systolic blood pressure, mmHg                | 134±17      | 134±17      | 133±17      | 134±16                 |
| Diastolic blood pressure, mmHg               | 89±11       | 89±10       | 88±11       | 89±10                  |
| Estimated glomerular filtration rate, ml/min | 87.2±12.0   | 84.2±12.7   | 84.8±13.0   | 85.1±13.0 <sup>†</sup> |
| Family history of CHD, %                     | 46.4        | 47.2        | 52.0        | 46.7                   |
| CHD at baseline, %                           | 24.3        | 21.6        | 20.6        | 20.0                   |
| CHD during follow-up, %                      | 22.1        | 22.8        | 17.8        | 17.7 <sup>†</sup>      |
| Cardiac medication at baseline, %            | 5.2         | 2.8         | 3.6         | 3.3                    |
| Cardiac medication during follow-up, %       | 62.8        | 66.7        | 62.0        | 62.1                   |
| Diabetes at baseline, %                      | 6.2         | 4.3         | 3.9         | 6.7                    |
| Diabetes during follow-up, %                 | 20.0        | 19.7        | 20.3        | 21.1                   |
| Hypertension at baseline, %                  | 58.4        | 59.5        | 57.8        | 58.2                   |
| Hypertension during follow-up, %             | 26.4        | 27.0        | 26.0        | 26.7                   |
| Atrial fibrillation at baseline, %           | 0.3         | 0.5         | 1.6         | 0.8                    |

|                                                           |           |           |           |                         |
|-----------------------------------------------------------|-----------|-----------|-----------|-------------------------|
| Atrial fibrillation during follow-up, %                   | 13.9      | 16.1      | 14.4      | 15.7                    |
| Cardiomyopathy at baseline, %                             | 1.3       | 2.0       | 1.2       | 0.8                     |
| Cardiomyopathy during follow-up, %                        | 0.8       | 0.8       | 1.0       | 1.1                     |
| History of stroke at baseline, %                          | 3.8       | 2.0       | 2.1       | 1.6                     |
| Stroke during follow up, %                                | 10.3      | 10.5      | 10.5      | 9.0                     |
| Valvular defect during follow-up, %                       | 4.4       | 5.9       | 3.8       | 3.0                     |
| Myocarditis during follow-up, %                           | 0.2       | 0.0       | 0.3       | 0.0                     |
| Chronic obstructive pulmonary disease at baseline, %      | 10.0      | 8.9       | 8.7       | 7.9                     |
| Chronic obstructive pulmonary disease during follow-up, % | 4.6       | 3.3       | 2.8       | 3.3                     |
| <b>Dietary factors</b>                                    |           |           |           |                         |
| Energy, kcal/d                                            | 2588±669  | 2328±600  | 2351±548  | 2529±634                |
| Protein, g/d                                              | 87.3±14.7 | 90.4±12.5 | 93.7±12.5 | 101.5±14.0 <sup>†</sup> |
| Protein, E%                                               | 14.7±2.3  | 15.4±2.3  | 15.9±2.4  | 17.0±2.5 <sup>†</sup>   |
| Animal protein, g/d                                       | 59.7±16.0 | 62.2±13.6 | 65.5±13.5 | 73.4±15.1 <sup>†</sup>  |
| Animal protein, E%                                        | 10.0±2.6  | 10.6±2.5  | 11.1±2.6  | 12.3±2.5 <sup>†</sup>   |
| Plant protein, g/d                                        | 25.4±6.9  | 25.9±5.6  | 26.0±5.5  | 25.9±5.9                |
| Plant protein, E%                                         | 4.3±1.1   | 4.4±1.0   | 4.4±1.0   | 4.4±0.9                 |

|                                                   |           |           |           |                        |
|---------------------------------------------------|-----------|-----------|-----------|------------------------|
| Fat, E%                                           | 39.9±6.4  | 38.8±5.7  | 38.0±5.7  | 38.0±5.6 <sup>†</sup>  |
| SFAs, E%                                          | 19.0±4.5  | 18.0±4.0  | 17.6±3.8  | 18.0±3.8 <sup>†</sup>  |
| PUFAs, E%                                         | 4.5±1.5   | 4.6±1.5   | 4.6±1.4   | 4.4±1.3                |
| MUFAs, E%                                         | 12.0±2.3  | 11.9±2.2  | 11.6±2.2  | 11.4±2.1 <sup>†</sup>  |
| <i>trans</i> Fatty acids, E%                      | 1.1±0.4   | 1.1±0.4   | 1.0±0.4   | 1.1±0.4                |
| Carbohydrates, E%                                 | 42.3±6.7  | 43.1±6.4  | 43.3±6.4  | 42.4±6.2               |
| Fiber, g/d                                        | 24.5±7.9  | 24.9±7.0  | 25.2±6.7  | 26.0±7.1 <sup>†</sup>  |
| Calcium, mg/d                                     | 1117±369  | 1193±293  | 1308±299  | 1576±335 <sup>†</sup>  |
| Fruits, berries and vegetables <sup>‡</sup> , g/d | 194 (183) | 222 (201) | 241 (211) | 258 (192) <sup>†</sup> |
| Whole grain products, g/d                         | 154 (99)  | 141 (88)  | 143 (85)  | 161 (90)               |
| Unprocessed red meat, g/d                         | 66 (69)   | 66 (62)   | 64 (64)   | 70 (65)                |
| Processed red meat, g/d                           | 65 (80)   | 58 (71)   | 53 (76)   | 56 (70) <sup>†</sup>   |
| Fish, g/d                                         | 31 (71)   | 30 (63)   | 31 (60)   | 31 (60)                |
| Non-fermented dairy, g/d                          | 704±370   | 528±301   | 458±303   | 401±280 <sup>†</sup>   |
| Fermented dairy g/d                               | 4 (21)    | 63 (121)  | 200 (223) | 408 (380) <sup>†</sup> |

CHD indicates coronary heart disease; E% percentage of energy intake.

\*Values are mean  $\pm$  SD for normally distributed variables, median (interquartile range) for skewed variables and percentages for categorical variables.

<sup>†</sup>*P* for trend across quartiles <0.05.

*P*-trend was assessed with linear regression (normally distributed variables), Jonckheere Terpstra -test (skewed variables) or with chi-square test (categorical variables).

<sup>‡</sup>Excluding potatoes.



**Supplemental table 4. Risk of incident heart failure according to the major protein sources among 2441 men from the Kuopio Ischaemic Heart Disease Risk Factor Study**

|                                          | Intake quartile |                               |                  |                  | <i>P</i> -trend | Per 100 g increase* |
|------------------------------------------|-----------------|-------------------------------|------------------|------------------|-----------------|---------------------|
|                                          | 1 (n=610)       | 2 (n=610)                     | 3 (n=611)        | 4 (n=610)        |                 |                     |
| Total meat <sup>†</sup>                  |                 |                               |                  |                  |                 |                     |
| Median intake (g/d)                      | 76              | 126                           | 173              | 251              |                 |                     |
| Number of events, incidence rate/1000 PY | 96, 7.28        | 81, 5.95                      | 84, 6.19         | 73, 5.27         |                 |                     |
| Model 1                                  | 1               | 0.94 (0.70–1.27) <sup>‡</sup> | 1.10 (0.81–1.48) | 1.19 (0.86–1.66) | 0.22            | 1.07 (0.92–1.25)    |
| Model 2                                  | 1               | 0.90 (0.67–1.22)              | 1.09 (0.80–1.47) | 1.10 (0.79–1.54) | 0.39            | 1.03 (0.88–1.20)    |
| Model 3                                  | 1               | 0.94 (0.69–1.29)              | 1.17 (0.83–1.63) | 1.23 (0.79–1.90) | 0.23            | 1.07 (0.86–1.34)    |
| Red meat                                 |                 |                               |                  |                  |                 |                     |
| Median intake (g/d)                      | 65              | 113                           | 156              | 231              |                 |                     |
| Number of events, incidence rate/1000 PY | 81, 6.12        | 100, 7.42                     | 78, 5.78         | 75, 5.34         |                 |                     |
| Model 1                                  | 1               | 1.40 (1.04–1.89)              | 1.22 (0.89–1.68) | 1.41 (1.00–1.97) | 0.11            | 1.10 (0.94–1.29)    |

|                                          |          |                  |                  |                  |      |                  |
|------------------------------------------|----------|------------------|------------------|------------------|------|------------------|
| Model 2                                  | 1        | 1.44 (1.07–1.94) | 1.16 (0.84–1.60) | 1.26 (0.90–1.78) | 0.37 | 1.02 (0.87–1.21) |
| Model 3                                  | 1        | 1.50 (1.10–2.04) | 1.22 (0.86–1.73) | 1.37 (0.89–2.11) | 0.29 | 1.04 (0.83–1.31) |
| Processed red meat                       |          |                  |                  |                  |      |                  |
| Median intake (g/d)                      | 10       | 40               | 76               | 139              |      |                  |
| Number of events, incidence rate/1000 PY | 89, 6.64 | 74, 5.62         | 93, 6.64         | 78, 5.71         |      |                  |
| Model 1                                  | 1        | 0.90 (0.66–1.22) | 1.24 (0.93–1.67) | 1.27 (0.92–1.74) | 0.05 | 1.20 (0.99–1.44) |
| Model 2                                  | 1        | 0.85 (0.62–1.15) | 1.05 (0.78–1.41) | 0.96 (0.70–1.32) | 0.88 | 1.02 (0.84–1.24) |
| Model 3                                  | 1        | 0.83 (0.61–1.14) | 1.05 (0.77–1.44) | 0.94 (0.64–1.38) | 0.94 | 1.02 (0.79–1.31) |
| Unprocessed red meat                     |          |                  |                  |                  |      |                  |
| Median intake (g/d)                      | 21       | 53               | 81               | 132              |      |                  |
| Number of events, incidence rate/1000 PY | 91, 6.85 | 90, 6.55         | 76, 5.67         | 77, 5.57         |      |                  |
| Model 1                                  | 1        | 0.97 (0.72–1.30) | 0.95 (0.69–1.29) | 1.00 (0.73–1.37) | 0.99 | 0.94 (0.74–1.19) |
| Model 2                                  | 1        | 1.01 (0.75–1.35) | 0.98 (0.72–1.34) | 1.14 (0.83–1.57) | 0.43 | 1.02 (0.80–1.29) |
| Model 3                                  | 1        | 1.00 (0.75–1.35) | 0.99 (0.72–1.36) | 1.16 (0.84–1.60) | 0.39 | 1.03 (0.81–1.32) |
| Fish                                     |          |                  |                  |                  |      |                  |
| Median intake (g/d)                      | 0        | 18               | 48               | 101              |      |                  |
| Number of events, incidence rate/1000 PY | 91, 6.77 | 69, 4.96         | 83, 6.05         | 91, 6.92         |      |                  |

|                                          |          |                  |                  |                  |       |                   |
|------------------------------------------|----------|------------------|------------------|------------------|-------|-------------------|
| Model 1                                  | 1        | 0.67 (0.49–0.91) | 0.82 (0.61–1.11) | 0.99 (0.74–1.32) | 0.38  | 1.08 (0.89–1.33)  |
| Model 2                                  | 1        | 0.60 (0.44–0.83) | 0.83 (0.61–1.11) | 0.85 (0.63–1.14) | 0.88  | 0.98 (0.80–1.20)  |
| Model 3                                  | 1        | 0.62 (0.45–0.85) | 0.84 (0.62–1.13) | 0.89 (0.66–1.21) | 0.64  | 1.01 (0.82–1.25)  |
| Egg                                      |          |                  |                  |                  |       |                   |
| Median intake (g/d)                      | 8        | 20               | 34               | 59               |       |                   |
| Number of events, incidence rate/1000 PY | 88, 7.15 | 85, 6.14         | 85, 6.03         | 76, 5.43         |       |                   |
| Model 1                                  | 1        | 0.82 (0.61–1.11) | 0.80 (0.59–1.09) | 0.75 (0.54–1.03) | 0.12  | 0.94 (0.74–1.20)* |
| Model 2                                  | 1        | 0.96 (0.71–1.30) | 0.96 (0.71–1.31) | 0.89 (0.64–1.22) | 0.47  | 1.01 (0.80–1.28)* |
| Model 3                                  | 1        | 0.99 (0.73–1.35) | 0.99 (0.73–1.35) | 0.92 (0.66–1.27) | 0.59  | 1.04 (0.82–1.32)* |
| Dairy products                           |          |                  |                  |                  |       |                   |
| Median intake (g/d)                      | 286      | 572              | 800              | 1122             |       |                   |
| Number of events, incidence rate/1000 PY | 78, 5.66 | 73, 5.36         | 88, 6.53         | 95, 7.11         |       |                   |
| Model 1                                  | 1        | 0.98 (0.71–1.36) | 1.20 (0.87–1.65) | 1.62 (1.14–2.29) | 0.004 | 1.06 (1.02–1.10)  |
| Model 2                                  | 1        | 0.89 (0.64–1.23) | 1.03 (0.75–1.42) | 1.36 (0.95–1.94) | 0.07  | 1.04 (1.00–1.08)  |
| Model 3                                  | 1        | 0.94 (0.68–1.31) | 1.09 (0.78–1.52) | 1.48 (1.02–2.16) | 0.03  | 1.05 (1.01–1.09)  |
| Non-fermented dairy products             |          |                  |                  |                  |       |                   |
| Median intake (g/d)                      | 156      | 371              | 585              | 909              |       |                   |

|                                          |          |                  |                  |                  |       |                  |
|------------------------------------------|----------|------------------|------------------|------------------|-------|------------------|
| Number of events, incidence rate/1000 PY | 84, 6.12 | 74, 5.42         | 99, 7.26         | 77, 5.83         |       |                  |
| Model 1                                  | 1        | 0.86 (0.63–1.17) | 1.16 (0.86–1.56) | 1.12 (0.79–1.57) | 0.24  | 1.03 (0.99–1.07) |
| Model 2                                  | 1        | 0.82 (0.59–1.12) | 0.96 (0.71–1.30) | 0.93 (0.65–1.31) | 0.94  | 1.00 (0.96–1.04) |
| Model 3                                  | 1        | 0.84 (0.61–1.16) | 1.00 (0.73–1.36) | 0.95 (0.66–1.37) | 0.98  | 1.01 (0.96–1.05) |
| Milk                                     |          |                  |                  |                  |       |                  |
| Median intake (g/d)                      | 140      | 349              | 564              | 876              |       |                  |
| Number of events, incidence rate/1000 PY | 85, 6.17 | 71, 5.19         | 105, 7.71        | 73, 5.55         |       |                  |
| Model 1                                  | 1        | 0.81 (0.59–1.11) | 1.23 (0.92–1.65) | 1.07 (0.76–1.51) | 0.24  | 1.03 (0.99–1.07) |
| Model 2                                  | 1        | 0.78 (0.57–1.07) | 1.02 (0.76–1.37) | 0.87 (0.61–1.24) | 0.84  | 1.00 (0.96–1.04) |
| Model 3                                  | 1        | 0.80 (0.58–1.11) | 1.07 (0.79–1.45) | 0.89 (0.62–1.28) | 0.94  | 1.01 (0.97–1.05) |
| Fermented dairy products                 |          |                  |                  |                  |       |                  |
| Median intake (g/d)                      | 3        | 55               | 179              | 435              |       |                  |
| Number of events, incidence rate/1000 PY | 76, 5.89 | 75, 5.36         | 73, 5.19         | 110, 8.29        |       |                  |
| Model 1                                  | 1        | 0.96 (0.69–1.32) | 0.84 (0.61–1.16) | 1.44 (1.07–1.93) | 0.003 | 1.06 (1.01–1.11) |
| Model 2                                  | 1        | 1.19 (0.86–1.64) | 1.00 (0.72–1.38) | 1.62 (1.20–2.19) | 0.001 | 1.06 (1.01–1.11) |
| Model 3                                  | 1        | 1.22 (0.88–1.68) | 1.02 (0.74–1.42) | 1.69 (1.25–2.29) | 0.001 | 1.06 (1.01–1.12) |
| Cheese                                   |          |                  |                  |                  |       |                  |

|                                                        |           |                  |                  |                  |       |                   |
|--------------------------------------------------------|-----------|------------------|------------------|------------------|-------|-------------------|
| Median intake (g/d)                                    | 0         | 9                | 24               | 50               |       |                   |
| Number of events, incidence rate/1000 PY               | 102, 7.39 | 91, 6.53         | 77, 5.82         | 64, 4.82         |       |                   |
| Model 1                                                | 1         | 0.82 (0.62–1.09) | 0.78 (0.58–1.05) | 0.81 (0.59–1.11) | 0.24  | 0.85 (0.66–1.10)* |
| Model 2                                                | 1         | 1.02 (0.76–1.36) | 0.99 (0.73–1.35) | 1.20 (0.86–1.68) | 0.31  | 1.14 (0.88–1.47)* |
| Model 3                                                | 1         | 1.05 (0.79–1.41) | 1.01 (0.74–1.37) | 1.22 (0.87–1.70) | 0.30  | 1.13 (0.88–1.45)* |
| Other fermented dairy <sup>§</sup>                     |           |                  |                  |                  |       |                   |
| Median intake (g/d)                                    | 0         | 50               | 185              | 446              |       |                   |
| Number of events, incidence rate/1000 PY <sup>  </sup> | 158, 8.82 | 95, 7.57         | 92, 7.57         | 124, 10.66       |       |                   |
| Model 1                                                | 1         | 0.85 (0.62–1.15) | 0.83 (0.61–1.13) | 1.40 (1.06–1.85) | 0.004 | 1.07 (1.02–1.12)  |
| Model 2                                                | 1         | 0.96 (0.71–1.32) | 0.91 (0.66–1.24) | 1.45 (1.09–1.92) | 0.006 | 1.06 (1.01–1.11)  |
| Model 3                                                | 1         | 1.00 (0.73–1.37) | 0.93 (0.68–1.27) | 1.50 (1.13–2.00) | 0.003 | 1.06 (1.01–1.11)  |
| Major plant protein sources <sup>#</sup>               |           |                  |                  |                  |       |                   |
| Median intake (g/d)                                    | 163       | 221              | 278              | 367              |       |                   |
| Number of events, incidence rate/1000 PY               | 91, 7.14  | 89, 6.61         | 77, 5.49         | 77, 5.50         |       |                   |
| Model 1                                                | 1         | 0.97 (0.72–1.31) | 0.81 (0.58–1.12) | 0.94 (0.65–1.36) | 0.59  | 0.94 (0.80–1.11)  |
| Model 2                                                | 1         | 1.10 (0.81–1.49) | 0.93 (0.66–1.30) | 1.11 (0.76–1.63) | 0.76  | 0.99 (0.84–1.16)  |
| Model 3                                                | 1         | 1.09 (0.79–1.51) | 0.92 (0.64–1.34) | 1.06 (0.66–1.71) | 0.98  | 0.92 (0.73–1.16)  |

PY indicates person-years.

\*For egg and cheese intakes the HRs (95% CIs) in the continuous models are presented per 50 g increase in intake, because of the low average intake compared to other food groups.

†Total meat includes red meat, white meat and offal.

‡Values are HRs (95% CIs) derived from Cox proportional hazards regression models.

§Other fermented dairy includes sour milk, yoghurt, curdled milk, quark, sour cream and crème fraiche.

||Number of subjects in the quartiles one to four: 829 (zero intake), 539, 537, and 536, respectively.

#Major plant protein sources include grain products, legumes, nuts, and seeds.

Model 1 adjusted for age (y), examination year, and energy intake (kcal/d).

Model 2 adjusted for Model 1 and education (y), income (euros/y), pack-years of smoking (packs smoked per day × years smoked), alcohol intake (g/week), leisure-time physical activity (kcal/d), body mass index (kg/m<sup>2</sup>), family history of coronary heart disease (yes/no), diseases (coronary heart diseases or use of cardiac medications, diabetes or hypertension) at the baseline and during the follow-up.

Model 3 adjusted for Model 2 and intakes of saturated (g/d), monounsaturated (g/d), polyunsaturated (g/d), and trans fatty acids (g/d) and fiber (g/d).

**Supplemental table 5. Risk of incident heart failure according to the dietary calcium intake among 2441 men from the Kuopio Ischaemic Heart Disease Risk Factor Study**

|                                           | Intake quartile |                   |                  |                  | <i>P</i> -trend | Per 100 mg increase |
|-------------------------------------------|-----------------|-------------------|------------------|------------------|-----------------|---------------------|
|                                           | 1 (n=610)       | 2 (n=610)         | 3 (n=611)        | 4 (n=610)        |                 |                     |
| Calcium intake                            |                 |                   |                  |                  |                 |                     |
| Median intake (mg/d)                      | 775             | 1116              | 1409             | 1849             |                 |                     |
| Number of events, incidence rate/1000 PY* | 71, 5.17        | 87, 6.35          | 73, 5.42         | 103, 7.72        |                 |                     |
| Model 1                                   | 1               | 1.13 (0.83–1.55)* | 0.95 (0.69–1.32) | 1.47 (1.09–2.00) | 0.02            | 1.04 (1.01–1.07)    |
| Model 2                                   | 1               | 1.09 (0.79–1.51)  | 0.91 (0.65–1.27) | 1.39 (1.01–1.91) | 0.07            | 1.05 (1.01–1.08)    |

PY indicates person-years.

\*Values are HRs (95% CIs) derived from Cox proportional hazards regression models.

Model 1 adjusted for age (y), examination year, and energy intake (kcal/d).

Model 2 adjusted for Model 1 and education (y), income (euros/y), pack-years of smoking (packs smoked per day × years smoked), alcohol intake (g/week), leisure-time physical activity (kcal/d), body mass index (kg/m<sup>2</sup>), family history of coronary heart disease (yes/no), diseases (coronary heart diseases or use of cardiac medications, diabetes or hypertension) at the baseline and during the follow-up, and intakes of saturated (g/d), monounsaturated (g/d), polyunsaturated (g/d), and trans fatty acids (g/d) and fiber (g/d).

**Supplemental Table 6. Risk of composite outcome of heart failure or cardiovascular disease death according to protein intake among 1640 men free of cardiovascular disease from the Kuopio Ischaemic Heart Disease Risk Factor Study**

|                                            | Intake quartile |                   |                  |                  | P-trend | Per 5 g increase |
|--------------------------------------------|-----------------|-------------------|------------------|------------------|---------|------------------|
|                                            | 1 (n=410)       | 2 (n=410)         | 3 (n=410)        | 4 (n=410)        |         |                  |
| <b>TOTAL PROTEIN</b>                       |                 |                   |                  |                  |         |                  |
| Median intake (g/d)                        | 78.3            | 88.3              | 96.8             | 109.7            |         |                  |
| Number of events, incidence rate/1000 PY   | 104, 11.04      | 91, 9.59          | 85, 8.91         | 99, 10.56        |         |                  |
| Model 1                                    | 1               | 0.90 (0.68–1.20)* | 0.88 (0.66–1.78) | 1.13 (0.85–1.49) | 0.42    | 1.02 (0.96–1.08) |
| Model 2                                    | 1               | 0.97 (0.73–1.30)  | 1.03 (0.77–1.39) | 1.26 (0.93–1.69) | 0.12    | 1.03 (0.98–1.09) |
| <b>Animal protein</b>                      |                 |                   |                  |                  |         |                  |
| Median intake (g/d)                        | 49.0            | 60.3              | 69.0             | 81.9             |         |                  |
| Number of events, incidence rate/1000 PY   | 100, 10.58      | 87, 8.92          | 93, 10.00        | 99, 10.62        |         |                  |
| Model 1                                    | 1               | 0.86 (0.64–1.14)  | 1.04 (0.78–1.39) | 1.20 (0.90–1.58) | 0.12    | 1.02 (0.97–1.07) |
| Model 2                                    | 1               | 0.83 (0.62–1.12)  | 1.06 (0.78–1.43) | 1.20 (0.87–1.65) | 0.13    | 1.03 (0.98–1.09) |
| <b>Protein from total meat<sup>†</sup></b> |                 |                   |                  |                  |         |                  |
| Median intake (g/d)                        | 12.6            | 20.5              | 27.5             | 38.2             |         |                  |
| Number of events, incidence rate/1000 PY   | 105, 11.29      | 99, 10.44         | 93, 9.73         | 82, 8.65         |         |                  |



|                                          |            |                  |                  |                  |      |                  |
|------------------------------------------|------------|------------------|------------------|------------------|------|------------------|
| Model 1                                  | 1          | 0.99 (0.75–1.31) | 0.99 (0.75–1.31) | 1.01 (0.76–1.36) | 0.94 | 1.00 (0.93–1.08) |
| Model 2                                  | 1          | 1.00 (0.74–1.34) | 1.06 (0.77–1.45) | 1.12 (0.77–1.63) | 0.50 | 1.01 (0.92–1.11) |
| Protein from red meat                    |            |                  |                  |                  |      |                  |
| Median intake (g/d)                      | 10.5       | 18.2             | 25.0             | 34.6             |      |                  |
| Number of events, incidence rate/1000 PY | 104, 11.25 | 91, 9.46         | 99, 10.52        | 85, 8.89         |      |                  |
| Model 1                                  | 1          | 0.87 (0.66–1.16) | 1.10 (0.84–1.45) | 0.98 (0.74–1.32) | 0.75 | 1.00 (0.93–1.07) |
| Model 2                                  | 1          | 0.96 (0.71–1.30) | 1.18 (0.86–1.62) | 1.09 (0.75–1.58) | 0.46 | 1.00 (0.90–1.10) |
| Protein from processed red meat          |            |                  |                  |                  |      |                  |
| Median intake (g/d)                      | 1.7        | 5.9              | 10.2             | 17.0             |      |                  |
| Number of events, incidence rate/1000 PY | 79, 8.44   | 103, 11.04       | 104, 10.92       | 93, 9.68         |      |                  |
| Model 1                                  | 1          | 1.38 (1.03–1.85) | 1.46 (1.09–1.96) | 1.41 (1.04–1.90) | 0.04 | 1.08 (0.97–1.20) |
| Model 2                                  | 1          | 1.40 (1.04–1.90) | 1.34 (0.97–1.84) | 1.33 (0.91–1.95) | 0.24 | 1.02 (0.87–1.18) |
| Protein from unprocessed red meat        |            |                  |                  |                  |      |                  |
| Median intake (g/d)                      | 4.0        | 9.6              | 14.8             | 23.8             |      |                  |
| Number of events, incidence rate/1000 PY | 100, 10.63 | 113, 11.96       | 91, 9.81         | 75, 7.74         |      |                  |
| Model 1                                  | 1          | 1.10 (0.84–1.44) | 0.94 (0.71–1.25) | 0.80 (0.59–1.08) | 0.07 | 0.94 (0.86–1.03) |
| Model 2                                  | 1          | 1.09 (0.83–1.45) | 0.99 (0.73–1.33) | 0.95 (0.68–1.34) | 0.63 | 0.99 (0.89–1.10) |

| Protein from fish                        |            |                  |                  |                  |      |                  |
|------------------------------------------|------------|------------------|------------------|------------------|------|------------------|
| Median intake (g/d)                      | 0          | 3.0              | 8.1              | 17.5             |      |                  |
| Number of events, incidence rate/1000 PY | 95, 9.95   | 97, 10.10        | 87, 9.14         | 100, 10.91       |      |                  |
| Model 1                                  | 1          | 0.96 (0.72–1.28) | 0.86 (0.64–1.16) | 1.02 (0.77–1.35) | 0.85 | 1.01 (0.93–1.09) |
| Model 2                                  | 1          | 0.95 (0.70–1.27) | 0.88 (0.65–1.19) | 0.93 (0.69–1.26) | 0.68 | 0.99 (0.90–1.09) |
| Protein from egg                         |            |                  |                  |                  |      |                  |
| Median intake (g/d)                      | 1.1        | 2.4              | 3.9              | 6.5              |      |                  |
| Number of events, incidence rate/1000 PY | 113, 12.81 | 87, 8.83         | 87, 9.05         | 92, 9.64         |      |                  |
| Model 1                                  | 1          | 0.62 (0.47–0.83) | 0.62 (0.47–0.83) | 0.70 (0.53–0.92) | 0.05 | 0.79 (0.57–1.08) |
| Model 2                                  | 1          | 0.73 (0.55–0.98) | 0.74 (0.55–0.99) | 0.81 (0.61–1.09) | 0.31 | 0.86 (0.63–1.19) |
| Protein from dairy                       |            |                  |                  |                  |      |                  |
| Median intake (g/d)                      | 17.0       | 25.1             | 31.6             | 40.4             |      |                  |
| Number of events, incidence rate/1000 PY | 87, 9.07   | 95, 10.06        | 86, 8.97         | 111, 12.06       |      |                  |
| Model 1                                  | 1          | 1.05 (0.79–1.41) | 0.92 (0.68–1.24) | 1.35 (1.02–1.78) | 0.07 | 1.05 (0.98–1.13) |
| Model 2                                  | 1          | 1.07 (0.80–1.44) | 1.00 (0.73–1.38) | 1.40 (1.02–1.92) | 0.05 | 1.08 (0.99–1.17) |
| Protein from non-fermented dairy         |            |                  |                  |                  |      |                  |
| Median intake (g/d)                      | 6.2        | 13.1             | 19.6             | 29.2             |      |                  |

|                                          |            |                  |                  |                  |       |                  |
|------------------------------------------|------------|------------------|------------------|------------------|-------|------------------|
| Number of events, incidence rate/1000 PY | 79, 8.04   | 91, 9.74         | 94, 9.81         | 115, 12.67       |       |                  |
| Model 1                                  | 1          | 1.14 (0.84–1.54) | 1.10 (0.81–1.48) | 1.47 (1.11–1.97) | 0.009 | 1.05 (0.97–1.13) |
| Model 2                                  | 1          | 1.25 (0.91–1.71) | 1.06 (0.77–1.47) | 1.56 (1.10–2.21) | 0.005 | 1.07 (0.97–1.18) |
| Protein from milk                        |            |                  |                  |                  |       |                  |
| Median intake (g/d)                      | 5.6        | 12.3             | 18.9             | 28.6             |       |                  |
| Number of events, incidence rate/1000 PY | 72, 7.28   | 97, 10.43        | 99, 10.34        | 111, 12.25       |       |                  |
| Model 1                                  | 1          | 1.36 (1.00–1.85) | 1.31 (0.96–1.78) | 1.59 (1.18–2.14) | 0.005 | 1.05 (0.97–1.14) |
| Model 2                                  | 1          | 1.45 (1.05–1.99) | 1.25 (0.90–1.74) | 1.60 (1.11–2.30) | 0.006 | 1.06 (0.96–1.18) |
| Protein from fermented dairy             |            |                  |                  |                  |       |                  |
| Median intake (g/d)                      | 1.3        | 7.2              | 13.0             | 22.7             |       |                  |
| Number of events, incidence rate/1000 PY | 104, 11.36 | 83, 8.72         | 94, 9.70         | 98, 10.36        |       |                  |
| Model 1                                  | 1          | 0.74 (0.55–0.98) | 0.85 (0.64–1.13) | 0.97 (0.74–1.28) | 0.77  | 1.02 (0.94–1.10) |
| Model 2                                  | 1          | 0.86 (0.64–1.16) | 1.24 (0.92–1.68) | 1.44 (1.05–1.99) | 0.006 | 1.09 (0.99–1.20) |
| Protein from cheese                      |            |                  |                  |                  |       |                  |
| Median intake (g/d)                      | -0.1       | 2.3              | 6.2              | 13.8             |       |                  |
| Number of events, incidence rate/1000 PY | 116, 12.83 | 102, 10.88       | 81, 8.34         | 80, 8.24         |       |                  |
| Model 1                                  | 1          | 0.83 (0.63–1.09) | 0.65 (0.49–0.87) | 0.77 (0.57–1.03) | 0.08  | 0.86 (0.75–0.99) |

|                                                 |            |                   |                   |                   |      |                  |
|-------------------------------------------------|------------|-------------------|-------------------|-------------------|------|------------------|
| Model 2                                         | 1          | 0.93 (0.70–1.22)  | 0.84 (0.63–1.13)  | 1.20 (0.87–1.65)  | 0.26 | 1.02 (0.88–1.18) |
| Protein from other fermented dairy <sup>‡</sup> |            |                   |                   |                   |      |                  |
| Median intake (g/d)                             | -0.5       | 1.2               | 5.1               | 13.7              |      |                  |
| Number of events, incidence rate/1000 PY        | 89, 9.40   | 89, 9.47          | 95, 9.81          | 106, 11.42        |      |                  |
| Model 1                                         | 1          | 0.90 (0.65–1.24)  | 0.92 (0.67–1.24)  | 1.05 (0.79–1.41)  | 0.41 | 1.12 (1.02–1.23) |
| Model 2                                         | 1          | 0.97 (0.70, 1.34) | 1.10 (0.81, 1.50) | 1.23 (0.90, 1.69) | 0.11 | 1.14 (1.02–1.28) |
| <b>Plant protein</b>                            |            |                   |                   |                   |      |                  |
| Median intake (g/d)                             | 19.8       | 23.9              | 27.4              | 32.4              |      |                  |
| Number of events, incidence rate/1000 PY        | 106, 11.70 | 85, 8.96          | 97, 10.14         | 91, 9.36          |      |                  |
| Model 1                                         | 1          | 0.70 (0.53–0.94)  | 0.77 (0.58–1.02)  | 0.72 (0.54–0.95)  | 0.05 | 0.96 (0.83–1.10) |
| Model 2                                         | 1          | 0.83 (0.61–1.15)  | 1.11 (0.78–1.59)  | 1.13 (0.72–1.77)  | 0.36 | 1.11 (0.85–1.43) |
| Protein from grain products                     |            |                   |                   |                   |      |                  |
| Median intake (g/d)                             | 14.7       | 18.6              | 21.9              | 26.9              |      |                  |
| Number of events, incidence rate/1000 PY        | 103, 11.29 | 89, 9.35          | 95, 9.96          | 92, 9.54          |      |                  |
| Model 1                                         | 1          | 0.77 (0.58–1.03)  | 0.78 (0.59–1.03)  | 0.78 (0.58–1.03)  | 0.11 | 0.97 (0.84–1.12) |
| Model 2                                         | 1          | 0.89 (0.65–1.22)  | 0.98 (0.69–1.40)  | 1.08 (0.69–1.68)  | 0.63 | 1.10 (0.85–1.43) |
| Protein from non-grain plant protein sources    |            |                   |                   |                   |      |                  |

|                                          |            |                  |                  |                  |      |                  |
|------------------------------------------|------------|------------------|------------------|------------------|------|------------------|
| Median intake (g/d)                      | 3.0        | 4.4              | 5.7              | 7.8              |      |                  |
| Number of events, incidence rate/1000 PY | 100, 10.75 | 105, 11.11       | 80, 8.35         | 94, 9.89         |      |                  |
| Model 1                                  | 1          | 0.99 (0.76–1.31) | 0.75 (0.56–1.01) | 0.93 (0.70–1.23) | 0.37 | 0.97 (0.84–1.12) |
| Model 2                                  | 1          | 1.31 (0.98–1.76) | 0.95 (0.69–1.31) | 1.31 (0.92–1.85) | 0.32 | 1.10 (0.85–1.43) |

PY indicates person-years.

\*Values are HRs (95% CIs) derived from Cox proportional hazards regression models.

†Total meat includes red meat, white meat and offal.

‡Protein from other fermented dairy includes all the fermented dairy products excluding cheese, i.e. sour milk, yoghurt, curdled milk, quark, sour cream and crème fraiche.

Model 1 adjusted for age (y), examination year, and energy intake (kcal/d).

Model 2 adjusted for Model 1 and education (y), income (euros/y), pack-years of smoking (packs smoked per day × years smoked), alcohol intake (g/week), leisure-time physical activity (kcal/d), body mass index (kg/m<sup>2</sup>), family history of coronary heart disease (yes/no), diseases (diabetes or hypertension or use of cardiac medications) at the baseline and during the follow-up, and intakes of saturated (g/d), monounsaturated (g/d), polyunsaturated (g/d), and trans fatty acids (g/d) and fiber (g/d). Model 2 was also mutually adjusted for other proteins.



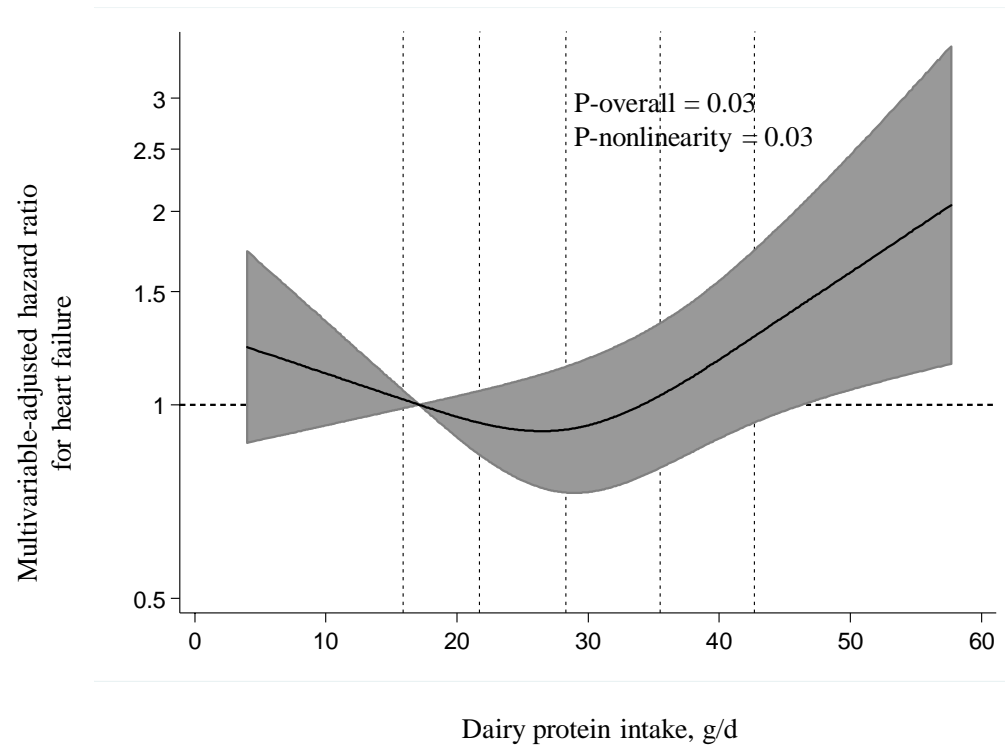

**Supplemental Figure 2.** Multivariable-adjusted hazard ratios of dairy protein intake with risk of heart failure in 2441 men, evaluated by restricted cubic splines from Cox proportional hazards models. The model is adjusted for age (y), examination year energy intake (kcal/d), education (y), income (euros/y), pack-years of smoking (packs smoked per day  $\times$  years smoked), alcohol intake (g/week), leisure-time physical activity (kcal/d), body mass index ( $\text{kg}/\text{m}^2$ ), family history of coronary heart disease (yes/no), diseases (coronary heart diseases or use of cardiac medications, diabetes or hypertension) at the baseline and during the follow-up, and intakes of saturated (g/d), monounsaturated (g/d), polyunsaturated (g/d), and trans fatty acids (g/d) and fiber (g/d). Model was also mutually adjusted for other proteins (meat, fish, egg and plant protein). The solid lines represent the central risk estimates and the shades are the 95% confidence interval, relative to the reference level (12.5<sup>th</sup> percentile). The dotted vertical lines correspond to 10<sup>th</sup>, 25<sup>th</sup>, 50<sup>th</sup>, 75<sup>th</sup> and 90<sup>th</sup> percentile of the dairy protein intake.
